# Supplementary material for: Aldose Reductase Drives Hyperacetylation of Egr-1 in Hyperglycemia and Consequent Upregulation of Proinflammatory and Prothrombotic Signals
Source: PubMed Central journal article supplement — Diabetes. 2014 Jan 16;63(2):761–74. doi: 10.2337/db13-0032 (PMC3900544; doi:10.2337/db13-0032), 2014-01-16

SUPPLEMENTARY DATA

**Supplementary Figure 1.** (a) Nuclear fractions of aorta samples from non diabetic WT or hAR transgenic mice were analyzed by western blot for expression of Egr-1. (b) Expression of Egr-1 in aorta collected from apoE<sup>-/-</sup>-hAR treated with streptozotocin. The tissues were extracted after 8, 10, 12 and 14 weeks of treatment with streptozotocin. Results are representative of 5 mice per group.

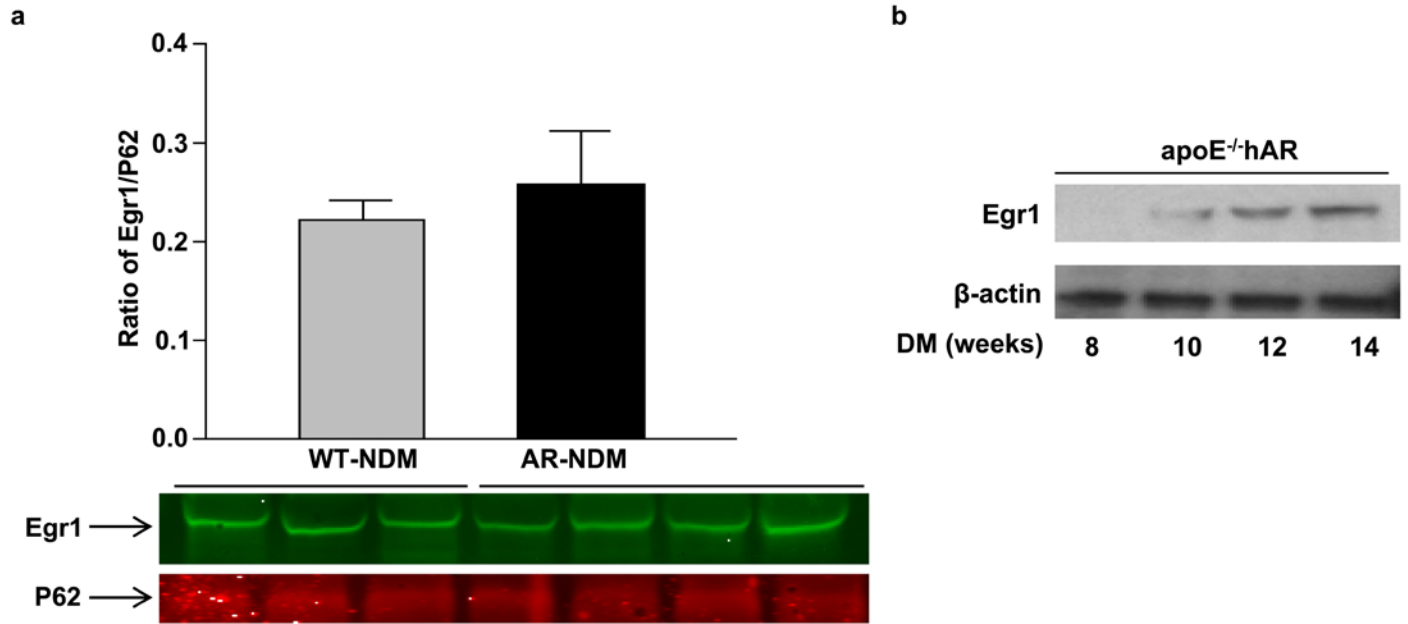

**Supplementary Figure 2.** Total HAT activity measured using assay kit (Activ Motif, USA) (Cat#56100) in MAECs. The figure represents percent total HAT activity in HAECs treated with low glucose, high glucose, high glucose along with ARI and high glucose with SDI.

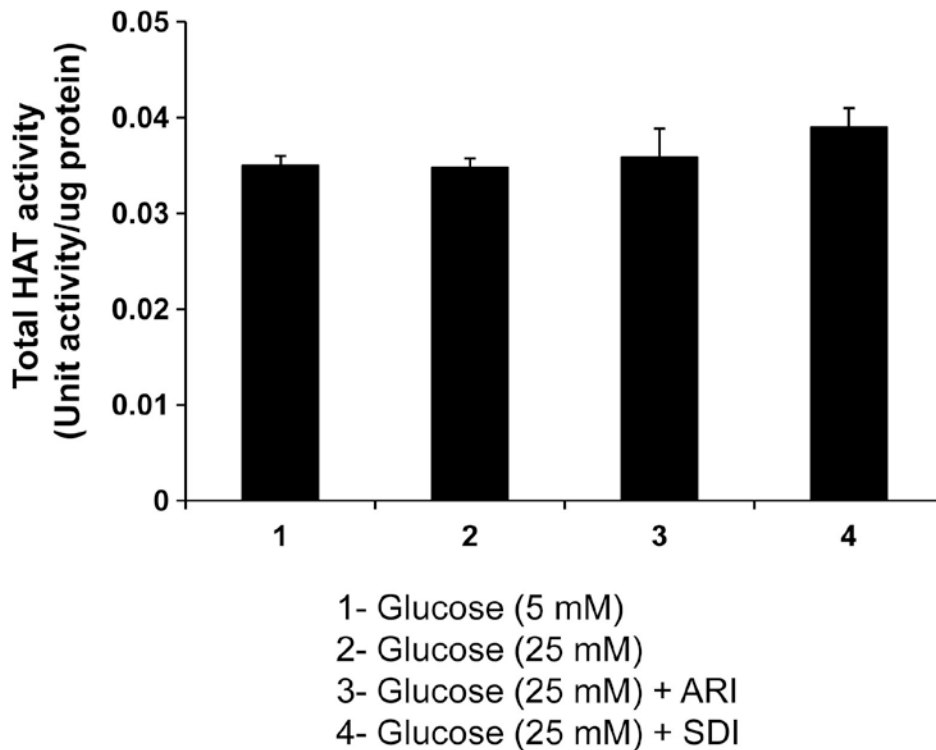

SUPPLEMENTARY DATA

**Supplementary Figure 3.** Expression of acetylated Egr-1 in MAECs over expressing hAR, treated with low glucose along with FK (NAMPT inhibitor) for 4 hrs.

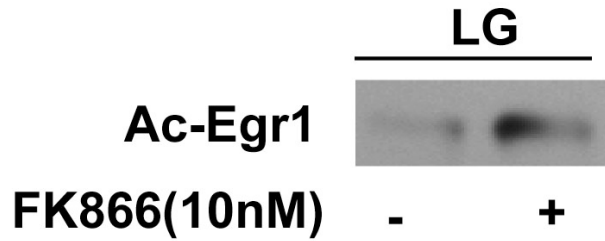

**Supplementary Figure 4.** Expression of acetylated Egr-1 in HAECs treated with low glucose along with high glucose; HAEC over expressing sirt 1 or GFP at high glucose and HAEC treated with DMSO or SRT1720(10uM) an activator of sirt1 for 5hrs. The figure shows a representation of at least three independent experiments.

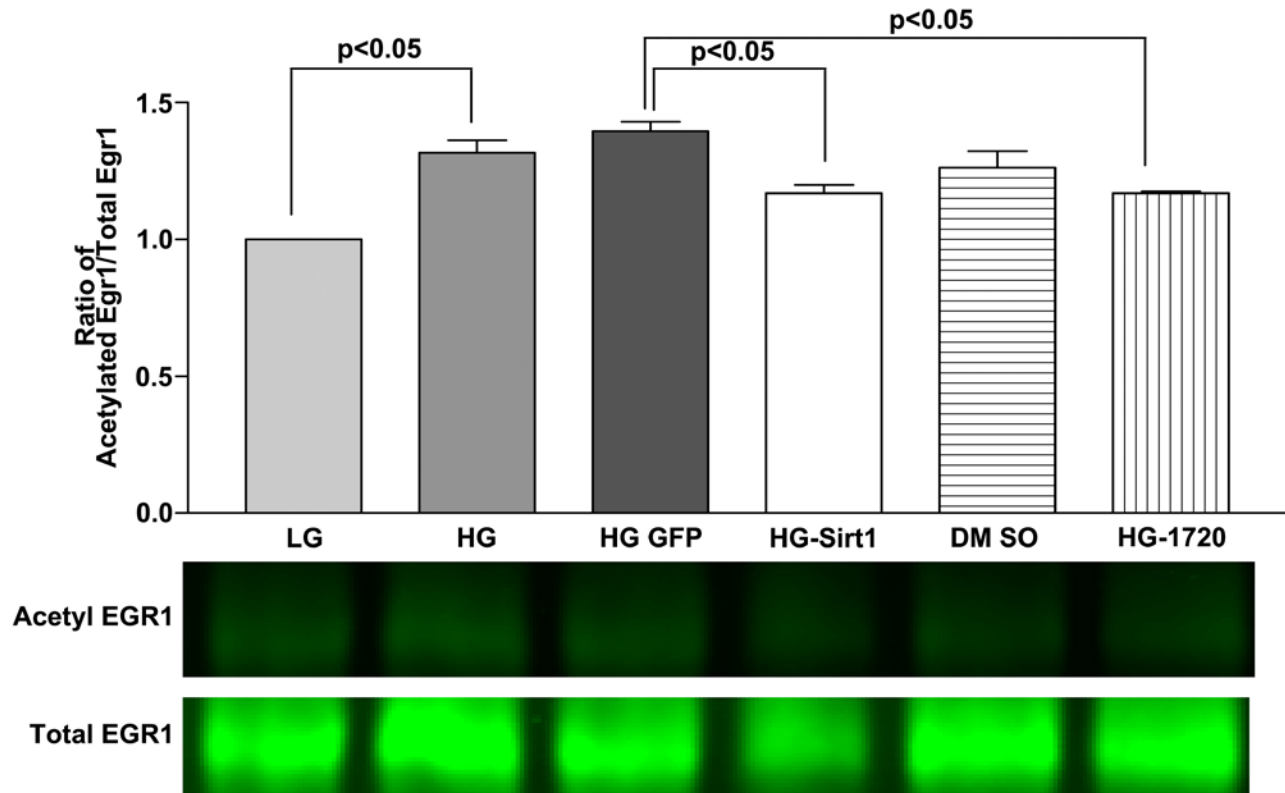

Supplement: supp_db13-0032_DB130032SupplementaryData.pdf [file supp_db13-0032_DB130032SupplementaryData.pdf]
